# Supplementary material for: Bioinformatic Analysis of Key Regulatory Genes in Adult Asthma and Prediction of Potential Drug Candidates
Source: MDPI journal article supplement (doi:10.3390/molecules28104100), 2023-05-15
Supplement: s1 [file s1]

Supplementary Table S2

| Rank | Algorithm |         |          |          |          |            |              |           |           |             |          |                        |
|------|-----------|---------|----------|----------|----------|------------|--------------|-----------|-----------|-------------|----------|------------------------|
|      | MCC       | DMNC    | MNC      | Degree   | EPC      | BottleNeck | EcCentricity | Closeness | Radiality | Betweenness | Stress   | Clustering coefficient |
| 1    | POSTN     | CST2    | POSTN    | POSTN    | POSTN    | POSTN      | CPA3         | POSTN     | POSTN     | POSTN       | POSTN    | CST2                   |
| 2    | CPA3      | CDH26   | CPA3     | CPA3     | CPA3     | SERPINB2   | SERPINB10    | CPA3      | CPA3      | BDNF        | BDNF     | TAL1                   |
| 3    | CCL26     | TPSB2   | KIT      | KIT      | SERPINB2 | CPA3       | CST1         | SERPINB2  | SERPINB2  | CPA3        | CPA3     | CDH26                  |
| 4    | SERPINB2  | MUC5B   | SERPINB2 | BDNF     | KIT      | BPIFA1     | POSTN        | BDNF      | BDNF      | SERPINB2    | TMEM200A | SLC18A2                |
| 5    | CLCA1     | TPSAB1  | C3       | SERPINB2 | MUC5B    | BDNF       | CCL26        | KIT       | KIT       | KIT         | BPIFA1   | KCNQ3                  |
| 6    | TPSAB1    | CST4    | BPIFA1   | C3       | CCL26    | TPSB2      | MUC5B        | BPIFA1    | MUC5B     | BPIFA1      | SERPINB2 | PEG3                   |
| 7    | TPSB2     | CCL26   | BDNF     | BPIFA1   | BPIFA1   | VGLL3      | TPSAB1       | MUC5B     | BPIFA1    | CLCA1       | CLCA1    | SERPINB10              |
| 8    | MUC5B     | CST1    | MUC5B    | MUC5B    | BDNF     | CD200R1    | LTF          | CLCA1     | CLCA1     | LTF         | KIT      | TPSB2                  |
| 9    | BPIFA1    | CLCA1   | CLCA1    | LTF      | LTF      | GATA2      | C3           | C3        | TPSAB1    | GADD45B     | LTF      | CST4                   |
| 10   | CST1      | SLC18A2 | CST1     | CLCA1    | CLCA1    | TMEM200A   | TPSB2        | LTF       | LTF       | TMEM200A    | GADD45B  | TPSAB1                 |
