# Supplementary material for: Bioinformatic Analysis of Key Regulatory Genes in Adult Asthma and Prediction of Potential Drug Candidates
Source: MDPI journal article supplement (doi:10.3390/molecules28104100), 2023-05-15
Supplement: s1 [file s1]

Supplementary Table S1

| DEGs | Function                                             | FDR         |
|------|------------------------------------------------------|-------------|
| Up   | endopeptidase inhibitor activity                     | 0.011172907 |
|      | endopeptidase regulator activity                     | 0.012311225 |
|      | peptidase inhibitor activity                         | 0.012311225 |
|      | cellular response to nerve growth factor stimulus    | 0.025332526 |
|      | granulocyte differentiation                          | 0.025332526 |
|      | peptidase regulator activity                         | 0.025332526 |
|      | response to nerve growth factor                      | 0.072539032 |
|      | myeloid leukocyte differentiation                    | 0.079721175 |
|      | erythrocyte homeostasis                              | 0.085077076 |
|      | regulation of myotube differentiation                | 0.086863007 |
|      | neurotrophin signaling pathway                       | 0.086863007 |
| Down | humoral immune response                              | 9.24E-07    |
|      | defense response to bacterium                        | 3.42189E-05 |
|      | mucosal immune response                              | 0.085259625 |
|      | antimicrobial humoral response                       | 0.106437279 |
|      | organ or tissue specific immune response             | 0.106437279 |
|      | secretory granule lumen                              | 0.137497276 |
|      | specific granule                                     | 0.373765116 |
|      | cell aggregation                                     | 0.373765116 |
|      | adhesion of symbiont to host                         | 0.438013852 |
|      | regulation of toll-like receptor 4 signaling pathway | 0.807796695 |
