# Supplementary material for: Bioinformatic Analysis of Key Regulatory Genes in Adult Asthma and Prediction of Potential Drug Candidates
Source: Molecules. 2023 May 15;28(10):4100. doi: 10.3390/molecules28104100 (PMC10221115; doi:10.3390/molecules28104100)
Supplement: Supplementary file 1 [file molecules-28-04100-s001.zip › Supplementary Table S3.xlsx]

## Sheet: Sheet1
Rank	score	Perturbation	Perturbation LIFE URL	Perturbation PubChem URL	Perturbation DrugBank URL	Cell-line	Dose	Time	Signature URL
1	0.1395	PX12	http://life.ccs.miami.edu/life/summary?mode=SmallMolecule&source=BROAD&input=BRD-A56592690	http://pubchem.ncbi.nlm.nih.gov/summary/summary.cgi?cid=219104	None	WSUDLCL2	30.0um	6.0h	https://maayanlab.cloud/L1000CDS2/meta?sig_id=CPC006_WSUDLCL2_6H:BRD-A56592690:30.0
2	0.1395	BRD-A18411371	http://life.ccs.miami.edu/life/summary?mode=SmallMolecule&source=BROAD&input=BRD-A18411371	http://pubchem.ncbi.nlm.nih.gov/summary/summary.cgi?cid=12004949	None	HT29	10.0um	6.0h	https://maayanlab.cloud/L1000CDS2/meta?sig_id=CPC010_HT29_6H:BRD-A18411371:10.0
3	0.1395	BRD-K04156788	http://life.ccs.miami.edu/life/summary?mode=SmallMolecule&source=BROAD&input=BRD-K04156788	http://pubchem.ncbi.nlm.nih.gov/summary/summary.cgi?cid=25126	None	HCC515	10.0um	6.0h	https://maayanlab.cloud/L1000CDS2/meta?sig_id=CPC013_HCC515_6H:BRD-K04156788:10.0
4	0.1395	GSK-1070916	http://life.ccs.miami.edu/life/summary?mode=SmallMolecule&source=BROAD&input=BRD-K36740062	http://pubchem.ncbi.nlm.nih.gov/summary/summary.cgi?cid=46885626	None	HEPG2	10um	24h	https://maayanlab.cloud/L1000CDS2/meta?sig_id=LJP008_HEPG2_24H:BRD-K36740062:10
5	0.1395	KIN001-043	http://life.ccs.miami.edu/life/summary?mode=SmallMolecule&source=BROAD&input=BRD-K44100512	None	None	A375	10um	24h	https://maayanlab.cloud/L1000CDS2/meta?sig_id=LJP006_A375_24H:BRD-K44100512:10
6	0.1163	geldanamycin	http://life.ccs.miami.edu/life/summary?mode=SmallMolecule&source=BROAD&input=BRD-A19500257	http://pubchem.ncbi.nlm.nih.gov/summary/summary.cgi?cid=13017911	None	HCC515	10.0um	24.0h	https://maayanlab.cloud/L1000CDS2/meta?sig_id=CPC001_HCC515_24H:BRD-A19500257:10.0
7	0.1163	Parthenolide	http://life.ccs.miami.edu/life/summary?mode=SmallMolecule&source=BROAD&input=BRD-K98548675	http://pubchem.ncbi.nlm.nih.gov/summary/summary.cgi?cid=6473881	None	VCAP	10.0um	6.0h	https://maayanlab.cloud/L1000CDS2/meta?sig_id=CPC002_VCAP_6H:BRD-K98548675:10.0
8	0.1163	OXIBENDAZOLE	http://life.ccs.miami.edu/life/summary?mode=SmallMolecule&source=BROAD&input=BRD-K52075715	http://pubchem.ncbi.nlm.nih.gov/summary/summary.cgi?cid=4622	None	HEPG2	10.0um	6.0h	https://maayanlab.cloud/L1000CDS2/meta?sig_id=CPC004_HEPG2_6H:BRD-K52075715:10.0
9	0.1163	Amyleine hydrochloride	http://life.ccs.miami.edu/life/summary?mode=SmallMolecule&source=BROAD&input=BRD-A09062839	http://pubchem.ncbi.nlm.nih.gov/summary/summary.cgi?cid=10767	None	A375	10.0um	24.0h	https://maayanlab.cloud/L1000CDS2/meta?sig_id=CPC005_A375_24H:BRD-A09062839:10.0
10	0.1163	curcumin	http://life.ccs.miami.edu/life/summary?mode=SmallMolecule&source=BROAD&input=BRD-K74148702	http://pubchem.ncbi.nlm.nih.gov/summary/summary.cgi?cid=16760039	None	A673	48.0um	6.0h	https://maayanlab.cloud/L1000CDS2/meta?sig_id=CPC006_A673_6H:BRD-K74148702:48.0
11	0.1163	Ro 28-1675 ?	http://life.ccs.miami.edu/life/summary?mode=SmallMolecule&source=BROAD&input=BRD-K21672174	http://pubchem.ncbi.nlm.nih.gov/summary/summary.cgi?cid=9886086	None	CL34	160.0um	6.0h	https://maayanlab.cloud/L1000CDS2/meta?sig_id=CPC006_CL34_6H:BRD-K21672174:160.0
12	0.1163	B675700.cdx	http://life.ccs.miami.edu/life/summary?mode=SmallMolecule&source=BROAD&input=BRD-K88510285	http://pubchem.ncbi.nlm.nih.gov/summary/summary.cgi?cid=387447	None	DV90	0.04um	6.0h	https://maayanlab.cloud/L1000CDS2/meta?sig_id=CPC006_DV90_6H:BRD-K88510285:0.04
13	0.1163	Parthenolide	http://life.ccs.miami.edu/life/summary?mode=SmallMolecule&source=BROAD&input=BRD-K98548675	http://pubchem.ncbi.nlm.nih.gov/summary/summary.cgi?cid=6473881	None	DV90	10.0um	6.0h	https://maayanlab.cloud/L1000CDS2/meta?sig_id=CPC006_DV90_6H:BRD-K98548675:10.0
14	0.1163	89671	http://life.ccs.miami.edu/life/summary?mode=SmallMolecule&source=BROAD&input=BRD-A31107743	http://pubchem.ncbi.nlm.nih.gov/summary/summary.cgi?cid=5353446	None	HA1E	0.09um	24.0h	https://maayanlab.cloud/L1000CDS2/meta?sig_id=CPC006_HA1E_24H:BRD-A31107743:0.09
15	0.1163	ZM 336372	http://life.ccs.miami.edu/life/summary?mode=SmallMolecule&source=BROAD&input=BRD-K73789395	http://pubchem.ncbi.nlm.nih.gov/summary/summary.cgi?cid=5730	None	HA1E	102.71um	24.0h	https://maayanlab.cloud/L1000CDS2/meta?sig_id=CPC006_HA1E_24H:BRD-K73789395:102.71
16	0.1163	Chemistry 2804	http://life.ccs.miami.edu/life/summary?mode=SmallMolecule&source=BROAD&input=BRD-K74402642	http://pubchem.ncbi.nlm.nih.gov/summary/summary.cgi?cid=6477762	None	HCC15	10.0um	6.0h	https://maayanlab.cloud/L1000CDS2/meta?sig_id=CPC006_HCC15_6H:BRD-K74402642:10.0
17	0.1163	Arachidonyl trifluoro-methyl ketone	http://life.ccs.miami.edu/life/summary?mode=SmallMolecule&source=BROAD&input=BRD-K07303502	http://pubchem.ncbi.nlm.nih.gov/summary/summary.cgi?cid=5280436	None	HCT116	80.0um	6.0h	https://maayanlab.cloud/L1000CDS2/meta?sig_id=CPC006_HCT116_6H:BRD-K07303502:80.0
18	0.1163	geldanamycin	http://life.ccs.miami.edu/life/summary?mode=SmallMolecule&source=BROAD&input=BRD-A19500257	http://pubchem.ncbi.nlm.nih.gov/summary/summary.cgi?cid=13017911	None	MDST8	10.0um	6.0h	https://maayanlab.cloud/L1000CDS2/meta?sig_id=CPC006_MDST8_6H:BRD-A19500257:10.0
19	0.1163	NSC 23766	http://life.ccs.miami.edu/life/summary?mode=SmallMolecule&source=BROAD&input=BRD-A80213327	http://pubchem.ncbi.nlm.nih.gov/summary/summary.cgi?cid=409805	None	MDST8	160.0um	6.0h	https://maayanlab.cloud/L1000CDS2/meta?sig_id=CPC006_MDST8_6H:BRD-A80213327:160.0
20	0.1163	N9-isoproplyolomoucine	http://life.ccs.miami.edu/life/summary?mode=SmallMolecule&source=BROAD&input=BRD-K71726959	http://pubchem.ncbi.nlm.nih.gov/summary/summary.cgi?cid=6610355	None	MDST8	122.55um	6.0h	https://maayanlab.cloud/L1000CDS2/meta?sig_id=CPC006_MDST8_6H:BRD-K71726959:122.55
21	0.1163	Rho kinase inhibitor III [rockout]	http://life.ccs.miami.edu/life/summary?mode=SmallMolecule&source=BROAD&input=BRD-K23875128	http://pubchem.ncbi.nlm.nih.gov/summary/summary.cgi?cid=644354	None	OV7	10.0um	6.0h	https://maayanlab.cloud/L1000CDS2/meta?sig_id=CPC006_OV7_6H:BRD-K23875128:10.0
22	0.1163	PAC 1	http://life.ccs.miami.edu/life/summary?mode=SmallMolecule&source=BROAD&input=BRD-K92991072	http://pubchem.ncbi.nlm.nih.gov/summary/summary.cgi?cid=6851947	None	OV7	10.0um	6.0h	https://maayanlab.cloud/L1000CDS2/meta?sig_id=CPC006_OV7_6H:BRD-K92991072:10.0
23	0.1163	curcumin	http://life.ccs.miami.edu/life/summary?mode=SmallMolecule&source=BROAD&input=BRD-K74148702	http://pubchem.ncbi.nlm.nih.gov/summary/summary.cgi?cid=16760039	None	PC3	48.0um	24.0h	https://maayanlab.cloud/L1000CDS2/meta?sig_id=CPC006_PC3_24H:BRD-K74148702:48.0
24	0.1163	Ro 28-1675 ?	http://life.ccs.miami.edu/life/summary?mode=SmallMolecule&source=BROAD&input=BRD-K21672174	http://pubchem.ncbi.nlm.nih.gov/summary/summary.cgi?cid=9886086	None	SNUC4	160.0um	6.0h	https://maayanlab.cloud/L1000CDS2/meta?sig_id=CPC006_SNUC4_6H:BRD-K21672174:160.0
25	0.1163	Emetine Dihydrochloride Hydrate (74)	http://life.ccs.miami.edu/life/summary?mode=SmallMolecule&source=BROAD&input=BRD-K01976263	http://pubchem.ncbi.nlm.nih.gov/summary/summary.cgi?cid=11957493	None	TYKNU	0.63um	6.0h	https://maayanlab.cloud/L1000CDS2/meta?sig_id=CPC006_TYKNU_6H:BRD-K01976263:0.63
26	0.1163	Chemistry 2804	http://life.ccs.miami.edu/life/summary?mode=SmallMolecule&source=BROAD&input=BRD-K74402642	http://pubchem.ncbi.nlm.nih.gov/summary/summary.cgi?cid=6477762	None	VCAP	10.0um	24.0h	https://maayanlab.cloud/L1000CDS2/meta?sig_id=CPC006_VCAP_24H:BRD-K74402642:10.0
27	0.1163	BRD-K23673040	http://life.ccs.miami.edu/life/summary?mode=SmallMolecule&source=BROAD&input=BRD-K23673040	http://pubchem.ncbi.nlm.nih.gov/summary/summary.cgi?cid=690299	None	HT29	10.0um	24.0h	https://maayanlab.cloud/L1000CDS2/meta?sig_id=CPC007_HT29_24H:BRD-K23673040:10.0
28	0.1163	BRD-K58214070	http://life.ccs.miami.edu/life/summary?mode=SmallMolecule&source=BROAD&input=BRD-K58214070	http://pubchem.ncbi.nlm.nih.gov/summary/summary.cgi?cid=4257368	None	HT29	10.0um	24.0h	https://maayanlab.cloud/L1000CDS2/meta?sig_id=CPC007_HT29_24H:BRD-K58214070:10.0
29	0.1163	VU0418939-2	http://life.ccs.miami.edu/life/summary?mode=SmallMolecule&source=BROAD&input=BRD-K69097969	http://pubchem.ncbi.nlm.nih.gov/summary/summary.cgi?cid=46742345	None	HCC515	10.0um	6.0h	https://maayanlab.cloud/L1000CDS2/meta?sig_id=CPC008_HCC515_6H:BRD-K69097969:10.0
30	0.1163	BRD-K03829970	http://life.ccs.miami.edu/life/summary?mode=SmallMolecule&source=BROAD&input=BRD-K03829970	http://pubchem.ncbi.nlm.nih.gov/summary/summary.cgi?cid=53338854	None	VCAP	10.0um	6.0h	https://maayanlab.cloud/L1000CDS2/meta?sig_id=CPC009_VCAP_6H:BRD-K03829970:10.0
31	0.1163	BRD-K70161581	http://life.ccs.miami.edu/life/summary?mode=SmallMolecule&source=BROAD&input=BRD-K70161581	http://pubchem.ncbi.nlm.nih.gov/summary/summary.cgi?cid=5720066	None	HCC515	10.0um	6.0h	https://maayanlab.cloud/L1000CDS2/meta?sig_id=CPC014_HCC515_6H:BRD-K70161581:10.0
32	0.1163	S1053	http://life.ccs.miami.edu/life/summary?mode=SmallMolecule&source=BROAD&input=BRD-K77908580	http://pubchem.ncbi.nlm.nih.gov/summary/summary.cgi?cid=4261	None	SKB	10.0um	24.0h	https://maayanlab.cloud/L1000CDS2/meta?sig_id=CPC014_SKB_24H:BRD-K77908580:10.0
33	0.1163	BRD-K09416995	http://life.ccs.miami.edu/life/summary?mode=SmallMolecule&source=BROAD&input=BRD-K09416995	http://pubchem.ncbi.nlm.nih.gov/summary/summary.cgi?cid=53232	http://www.drugbank.ca/drugs/DB00227	A549	10.0um	24.0h	https://maayanlab.cloud/L1000CDS2/meta?sig_id=CPC015_A549_24H:BRD-K09416995:10.0
34	0.1163	BRD-K92049597	http://life.ccs.miami.edu/life/summary?mode=SmallMolecule&source=BROAD&input=BRD-K92049597	http://pubchem.ncbi.nlm.nih.gov/summary/summary.cgi?cid=5546	http://www.drugbank.ca/drugs/DB00384	A549	10.0um	24.0h	https://maayanlab.cloud/L1000CDS2/meta?sig_id=CPC015_A549_24H:BRD-K92049597:10.0
35	0.1163	BRD-A31204924	http://life.ccs.miami.edu/life/summary?mode=SmallMolecule&source=BROAD&input=BRD-A31204924	http://pubchem.ncbi.nlm.nih.gov/summary/summary.cgi?cid=4211	http://www.drugbank.ca/drugs/DB00648	HT29	10.0um	6.0h	https://maayanlab.cloud/L1000CDS2/meta?sig_id=CPC015_HT29_6H:BRD-A31204924:10.0
36	0.1163	BRD-K37865504	http://life.ccs.miami.edu/life/summary?mode=SmallMolecule&source=BROAD&input=BRD-K37865504	http://pubchem.ncbi.nlm.nih.gov/summary/summary.cgi?cid=11507802	None	NEU	10.0um	24.0h	https://maayanlab.cloud/L1000CDS2/meta?sig_id=CPC016_NEU_24H:BRD-K37865504:10.0
37	0.1163	BRD-K23644387	http://life.ccs.miami.edu/life/summary?mode=SmallMolecule&source=BROAD&input=BRD-K23644387	http://pubchem.ncbi.nlm.nih.gov/summary/summary.cgi?cid=688666	None	NPC	10.0um	24.0h	https://maayanlab.cloud/L1000CDS2/meta?sig_id=CPC018_NPC_24H:BRD-K23644387:10.0
38	0.1163	BRD-K37043259	http://life.ccs.miami.edu/life/summary?mode=SmallMolecule&source=BROAD&input=BRD-K37043259	http://pubchem.ncbi.nlm.nih.gov/summary/summary.cgi?cid=44506240	None	A549	10.0um	24.0h	https://maayanlab.cloud/L1000CDS2/meta?sig_id=CPC019_A549_24H:BRD-K37043259:10.0
39	0.1163	trichostatin A	http://life.ccs.miami.edu/life/summary?mode=SmallMolecule&source=BROAD&input=BRD-A19037878	http://pubchem.ncbi.nlm.nih.gov/summary/summary.cgi?cid=6376322	None	VCAP	10.0um	24.0h	https://maayanlab.cloud/L1000CDS2/meta?sig_id=CPC019_VCAP_24H:BRD-A19037878:10.0
40	0.1163	radicicol	http://life.ccs.miami.edu/life/summary?mode=SmallMolecule&source=BROAD&input=BRD-A39996500	http://pubchem.ncbi.nlm.nih.gov/summary/summary.cgi?cid=5311380	None	A375	3.33um	24h	https://maayanlab.cloud/L1000CDS2/meta?sig_id=LJP005_A375_24H:BRD-A39996500:3.33
41	0.1163	geldanamycin	http://life.ccs.miami.edu/life/summary?mode=SmallMolecule&source=BROAD&input=BRD-A19500257	http://pubchem.ncbi.nlm.nih.gov/summary/summary.cgi?cid=13017911	None	A375	3.33um	24h	https://maayanlab.cloud/L1000CDS2/meta?sig_id=LJP005_A375_24H:BRD-A19500257:3.33
42	0.1163	NVP-AUY922	http://life.ccs.miami.edu/life/summary?mode=SmallMolecule&source=BROAD&input=BRD-K65182930	None	None	A375	3.33um	24h	https://maayanlab.cloud/L1000CDS2/meta?sig_id=LJP005_A375_24H:BRD-K65182930:3.33
43	0.1163	PD-0325901	http://life.ccs.miami.edu/life/summary?mode=SmallMolecule&source=BROAD&input=BRD-K49865102	http://pubchem.ncbi.nlm.nih.gov/summary/summary.cgi?cid=9826528	None	A375	0.04um	24h	https://maayanlab.cloud/L1000CDS2/meta?sig_id=LJP005_A375_24H:BRD-K49865102:0.04
44	0.1163	ponatinib	http://life.ccs.miami.edu/life/summary?mode=SmallMolecule&source=BROAD&input=BRD-K44227013	http://pubchem.ncbi.nlm.nih.gov/summary/summary.cgi?cid=24826799	None	PC3	10um	24h	https://maayanlab.cloud/L1000CDS2/meta?sig_id=LJP009_PC3_24H:BRD-K44227013:10
45	0.1163	PIK-93	http://life.ccs.miami.edu/life/summary?mode=SmallMolecule&source=BROAD&input=BRD-K29395450	None	None	BT20	10um	3h	https://maayanlab.cloud/L1000CDS2/meta?sig_id=LJP005_BT20_3H:BRD-K29395450:10
46	0.1163	geldanamycin	http://life.ccs.miami.edu/life/summary?mode=SmallMolecule&source=BROAD&input=BRD-A19500257	http://pubchem.ncbi.nlm.nih.gov/summary/summary.cgi?cid=13017911	None	HA1E	1.11um	24h	https://maayanlab.cloud/L1000CDS2/meta?sig_id=LJP005_HA1E_24H:BRD-A19500257:1.11
47	0.1163	PD-0325901	http://life.ccs.miami.edu/life/summary?mode=SmallMolecule&source=BROAD&input=BRD-K49865102	http://pubchem.ncbi.nlm.nih.gov/summary/summary.cgi?cid=9826528	None	A375	10um	24h	https://maayanlab.cloud/L1000CDS2/meta?sig_id=LJP009_A375_24H:BRD-K49865102:10
48	0.1163	I-BET151	http://life.ccs.miami.edu/life/summary?mode=SmallMolecule&source=BROAD&input=BRD-K36363294	None	None	PC3	3.33um	24h	https://maayanlab.cloud/L1000CDS2/meta?sig_id=LJP008_PC3_24H:BRD-K36363294:3.33
49	0.1163	PFI-1	http://life.ccs.miami.edu/life/summary?mode=SmallMolecule&source=BROAD&input=BRD-K13094524	None	None	PC3	10um	24h	https://maayanlab.cloud/L1000CDS2/meta?sig_id=LJP008_PC3_24H:BRD-K13094524:10
50	0.1163	mitoxantrone	http://life.ccs.miami.edu/life/summary?mode=SmallMolecule&source=BROAD&input=BRD-K21680192	http://pubchem.ncbi.nlm.nih.gov/summary/summary.cgi?cid=5458171	None	HT29	10um	24h	https://maayanlab.cloud/L1000CDS2/meta?sig_id=LJP005_HT29_24H:BRD-K21680192:10
